# Supplementary material
Source: HighWire-hosted journal article supplement (https://bmjopen.bmj.com/content/8/11/e021282)
Supplement: inline-supplementary-material-1 [file inline-supplementary-material-1.pdf]

## SECTION 1

### Scenario 1

#### Variables for randomisation:

##### 1. Experience

- senior experienced
- junior inexperienced

##### 2. Journal policy

- prohibits the submission of work that has previously been published
- has no policy regarding the submission of work that has previously been published

##### 3. How the study had previously been reported

- in an abstract at a professional meeting
- as a paper in the proceedings from a conference

A [experience] researcher submitted a manuscript describing the primary results of a study to a medical journal that [journal policy]. A peer reviewer comments that the same study results have already been published [How the study had previously been reported] and that this prior publication means the work is not new and should not be considered for publication by the journal.

On the scale of 0 to 10 below please rate how unethical you think this researcher's behaviour is:

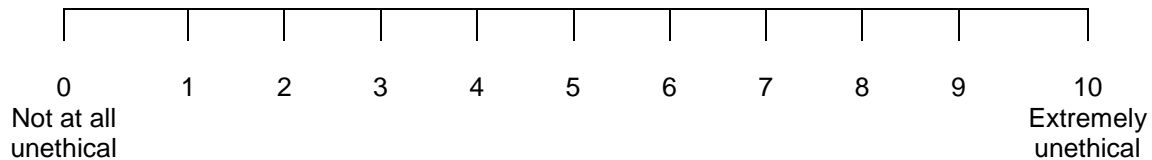

### Scenario 2

#### Variables for randomisation

##### 1. Experience

- senior experienced
- junior inexperienced

##### 2. Time

- 1 month
- 6 months

##### 3. Level of recognition

- recognises their contribution in the Acknowledgements section instead
- does not mention the student's contributions in the Acknowledgements section

A corresponding author, a [experience] member of staff, is ready to submit a manuscript. A research student, helped with the design of the study, data collection, and writing of the manuscript, but has since relocated and cannot be reached to provide final approval of the manuscript. After trying to contact the research student for [time], the corresponding author decides to remove the student's name from the paper, [level of recognition] and publishes the paper.

On the scale of 0 to 10 below please rate how unethical you think the corresponding author's behaviour is:

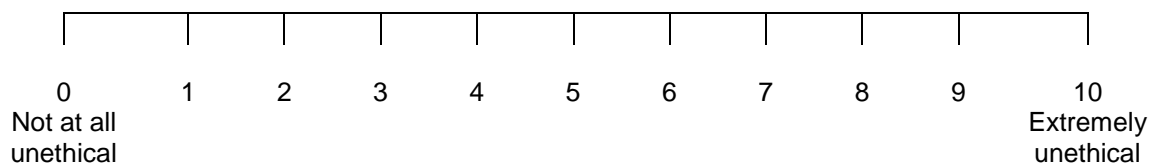

### Scenario 3

Variables for randomisation:

1. Experience

- senior experienced
- junior inexperienced

2. Quantity of overlapping material

- 10%
- 35%

3. Material

- in the Introduction section and the Methods describing the literature search strategy
- describing the interpretation of the literature

A [experience] author submitted a systematic review article to Journal X. A peer reviewer commented that parts of the paper reproduced work previously published by the same author in a textbook chapter. The reviewer claimed that about [quantity] of the text, mainly [material], appeared to be identical without any reference to the textbook chapter.

On the scale of 0 to 10 below please rate how unethical you think this author's behaviour is:

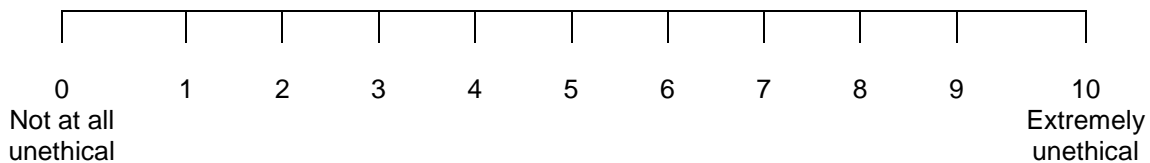

**Scenario 4**

Variables for randomisation

1. Experience:

- senior experienced
- junior inexperienced

2. Seniority of fourth author:

- professor and head of department
- junior inexperienced researcher who had not previously co-authored a research paper

3. Contribution:

- general advice on how to improve the Discussion section and identified some typographical corrections on reading the final version of the manuscript before submission
- general advice on how to improve the discussion section but did not read the final version of the manuscript before submission

Three [experience] authors from the same institution conducted a research study and wrote it up as a paper for publication. With agreement from the co-authors and after preparing the manuscript for submission, the corresponding author invited a fourth researcher to be the last-listed author. This author, a [seniority of fourth author], was familiar with the subject matter of the paper but had not been involved with the study. After agreeing to be an author, the fourth researcher gave [contribution].

On the scale of 0 to 10 below please rate how unethical you think the **corresponding author's** behaviour is:

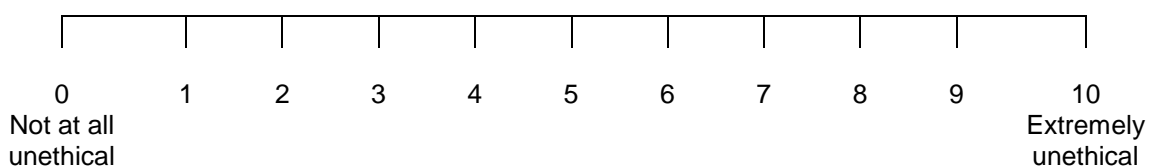

## Scenario 5

### Variables for randomisation:

1. Experience:
  - senior experienced
  - junior inexperienced
2. Length of conflict:
  - One year
  - Three years
3. Financial arrangement with company:
  - received a research grant from Company X in relation to a product discussed in the review article
  - received speaking fees from Company X for a lecture at a conference that included a discussion of a product included in the review article

A [experience] researcher submitted an unsolicited narrative review article to a medical journal. The article reviewed the treatment benefits of several major pharmaceutical products commonly used in the field. [Length of conflict] prior to this, the researcher [financial arrangement with company], but did not mention this on submission of the review.

On the scale of 0 to 10 below please rate how unethical you think this researcher's behaviour is:

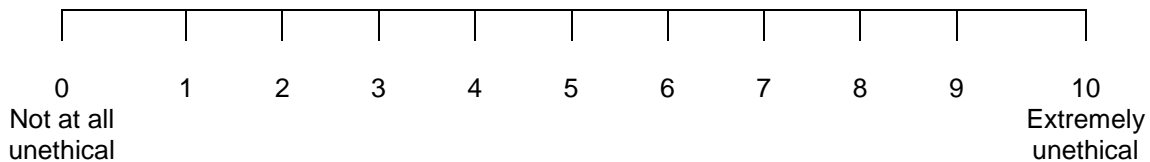

## SECTION 2

**This section asks about your knowledge of specific publication issues. Please select the statement that best describes your knowledge of each of the seven topics.**

1) **Self-plagiarism** is defined as the reuse or recycling of one's own previously published text, theories, images, data or tables usually without citation.

Please indicate your level of knowledge of self-plagiarism

- I have no knowledge of this topic
- I have some knowledge of this topic
- I have substantial knowledge of this topic

2) **Image manipulation** involves the modification of the originally captured image including the insertion or deletion of visual data.

Please indicate your level of knowledge of image manipulation:

- I have no knowledge of this topic
- I have some knowledge of this topic
- I have substantial knowledge of this topic

3) **Plagiarism** constitutes the use of the words, theories, images or data of others without proper credit and involves the passing off of material as one's own.

Please indicate your level of knowledge of plagiarism:

- I have no knowledge of this topic
- I have some knowledge of this topic
- I have substantial knowledge of this topic

4) **Prior publication** involves the use of data, tables and images that have previously been made public, often in a setting other than a journal article.

Please indicate your level of knowledge of prior publication:

- I have no knowledge of this topic
- I have some knowledge of this topic
- I have substantial knowledge of this topic

5) **Authorship** is defined as the identification of an individual who has contributed significantly to the reported research and the composition of the paper. Many journals have adopted criteria that define what contributions constitute authorship.

Please indicate your level of knowledge about authorship:

- I have no knowledge of this topic
- I have some knowledge of this topic
- I have substantial knowledge of this topic

6) **Conflict of interest** has been defined as a set of conditions in which professional judgment concerning a primary interest, such as patient welfare or the validity of research, can be influenced by a secondary interest, such as personal or financial gain.

Please indicate your level of knowledge about conflict of interest:

- I have no knowledge of this topic
- I have some knowledge of this topic
- I have substantial knowledge of this topic

7) **Dual submission** is defined as the simultaneous submission of the same manuscript to more than one journal.

Please indicate your level of knowledge of dual submission:

- I have no knowledge of this topic
- I have some knowledge of this topic
- I have substantial knowledge of this topic

|                  |
|------------------|
| <b>SECTION 3</b> |
|------------------|

1) In which country do you mainly work?

2) In which country did you mainly train as a researcher?

3) Are you?

- Female
- Male

4) What is your age? \_\_\_\_\_

5) What is your first (main) language?

- English
- Other (please specify): \_\_\_\_\_

6a) What is your clinical specialty?

OR

6b) Or if you are primarily an academic researcher, what is your research speciality? \_\_\_\_\_

7) For how many years have you been an active researcher?

- 1 – 2 years
- 3 – 5 years
- 6 – 10 years
- 11 – 15 years
- 16 – 20 years
- 21 – 25 years
- 26 - 30 years
- More than 30 years

8) Approximately how many research or review papers have you had published in journals (including papers that you have co-authored)? \_\_\_\_\_

9) On average, approximately how many journal articles do you peer review in a year? \_\_\_\_\_

10) Have you ever performed an editorial role, such as Editor in Chief or acted as an Editorial Board member?

- Yes
- No

11) How would you rate the quality of the training/guidance you have received on the ethics of publishing scientific research?

|                                                        | <b>Excellent</b> | <b>Good</b> | <b>Average</b> | <b>Poor</b> | <b>I have never received this type of training/guidance</b> |
|--------------------------------------------------------|------------------|-------------|----------------|-------------|-------------------------------------------------------------|
| From a scientific mentor                               |                  |             |                |             |                                                             |
| A course you attended devoting some time to this topic |                  |             |                |             |                                                             |
| A course you attended specifically on this topic       |                  |             |                |             |                                                             |
| Online resources on this topic                         |                  |             |                |             |                                                             |

Thank you for your help
